# Supplementary material for: Altered Cellular White Matter But Not Extracellular Free Water on Diffusion MRI in Individuals at Clinical High Risk for Psychosis
Source: Atypon-hosted journal article supplement (doi:10.1176/appi.ajp.2019.18091044), 2019-06-24
Supplement: appi.ajp.2019.18091044.ds001.pdf [file appi.ajp.2019.18091044.ds001.pdf]

**TABLE S1. Demographic and clinical characteristics of medicated and unmedicated subjects at clinical high risk for psychosis (CHR), respectively**

|                               | Medicated<br>CHR | Unmedicated<br>CHR | Statistical Significance    |
|-------------------------------|------------------|--------------------|-----------------------------|
| Cases                         | 10               | 40                 |                             |
| Age range (years)             | 16-26            | 14-32              |                             |
| Age (years)                   | 19.3±3.7         | 19.8±4.8           | t(48)=-0.32, p=0.75         |
| Gender (male/female)          | 8/2              | 22/18              | $\chi^2(50) = 2.08, p=0.15$ |
| Education (years)             | 10.9±2.2         | 10.4±2.5           | t(48)=0.55, p=0.59          |
| Parental education- Father    | 10.1±2.8         | 10.2±4.2           | t(45)=-0.07, p=0.95         |
| Parental education- Mother    | 9.1±3.3          | 9.6±4.6            | t(45)=-0.32, p=0.75         |
| SOPS_positive                 | 8.5±2.6          | 9.1±3.4            | t(48)=-0.52, p=0.61         |
| SOPS_negative                 | 15.9±6.8         | 12.0±6.2           | t(48)=1.78, p=0.08          |
| SOPS_disorganization          | 7.6±3.2          | 6.4±2.9            | t(48)=1.14, p=0.26          |
| SOPS_general                  | 8.8±3.3          | 9.2±3.2            | t(48)=-0.33, p=0.74         |
| Highest GAF                   | 78.4±2.7         | 76.4±6.7           | t(48)=0.91, p=0.37          |
| Current GAF                   | 48.9±7.3         | 51.9±6.9           | t(48)=-1.20, p=0.24         |
| Duration of symptoms (months) | 5.5±3.4          | 6.8±6.7            | t(48)=-0.59, p=0.56         |

Note: We had information about parental education from 9 medicated CHR and 38 unmedicated CHR.

**FIGURE S1.** Tract based spatial statistics analysis showed significantly lower FA values ( $p < 0.05$ , corrected for family wise error) in CHR subjects compared with healthy controls.

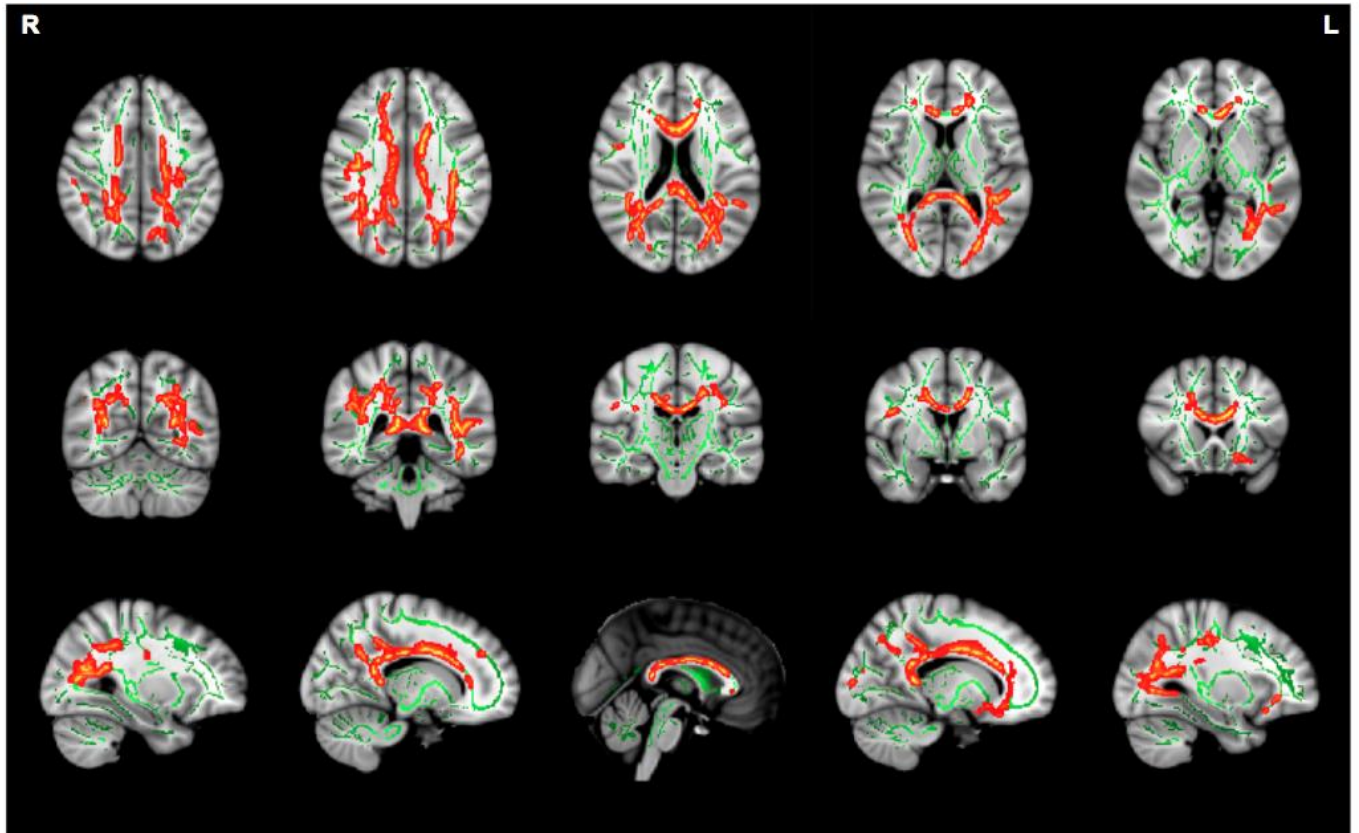

Note: The significant voxels covered 10.6% of the skeleton (14,267 voxels), and their location largely overlapped with the group differences in  $FA_T$  (See Main Text Figure 3).
